# Supplementary material
Source: HighWire-hosted journal article supplement (https://qdcxjkg.com/highwire/filestream/114594/field_highwire_adjunct_files/1/erj01836-2014_FigureS2.pdf)

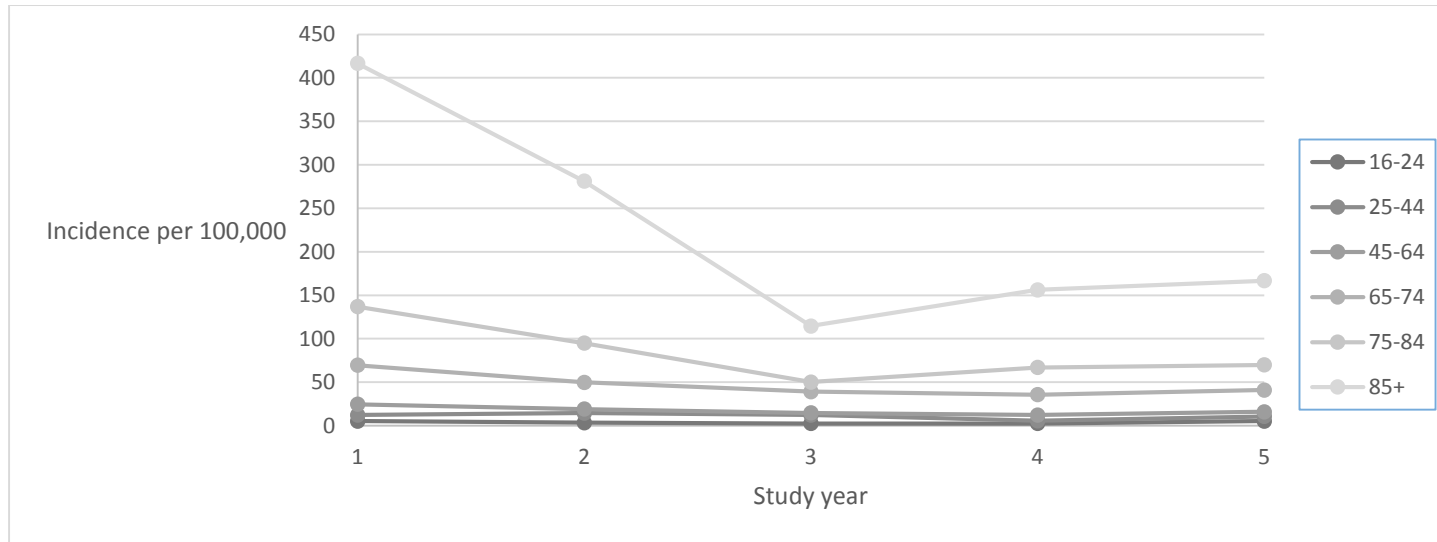

Supplement: erj01836-2014_FigureS2.pdf [file erj01836-2014_FigureS2.pdf]
